# Supplementary material
Source: Springer Nature journal article supplement (https://www.springermedizin.de/resource/supplementary/12901_2011_85_MOESM2_ESM.pdf/9515214)

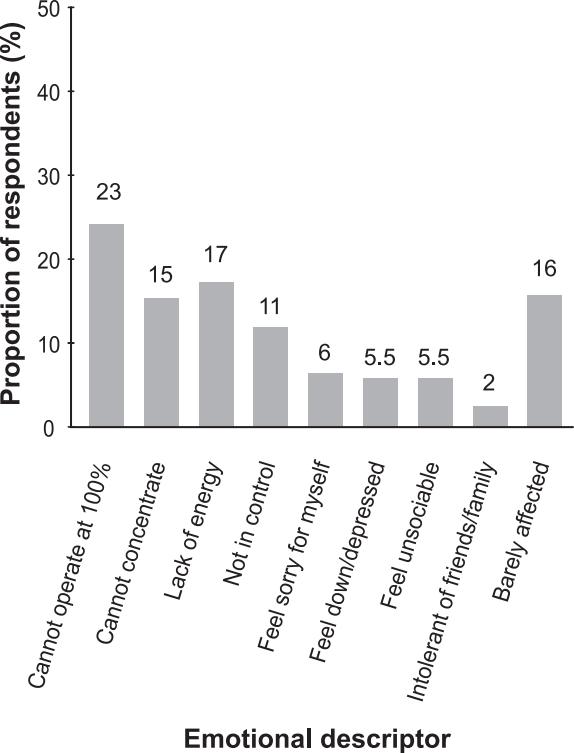

Supplement: MOESM2 [file 9515214]
